# Supplementary material
Source: ML conference proceedings conference paper supplement (https://proceedings.neurips.cc/paper_files/paper/2013/hash/6d0f846348a856321729a2f36734d1a7-Abstract.html)
Supplement: Supplementary file [file 6d0f846348a856321729a2f36734d1a7-Supplemental.zip]

## A Proof of Lemma 3.2

**Lemma 3.2.** *Let  $M' \in \mathbb{R}^{d \times d}$  be a symmetric matrix, with eigenvalues  $\sigma'_1, \dots, \sigma'_d$  and associated eigenvectors  $v'_1, \dots, v'_d$ . If  $M = \mathcal{P}(M')$  projects  $M'$  onto the feasible region of Problem 3.3 with respect to the Frobenius norm, then  $M$  will be the unique feasible matrix which has the same set of eigenvectors as  $M'$ , with the associated eigenvalues  $\sigma_1, \dots, \sigma_d$  satisfying:*

$$\sigma_i = \max(0, \min(1, \sigma'_i + S))$$

with  $S \in \mathbb{R}$  being chosen in such a way that  $\sum_{i=1}^d \sigma_i = k$ .

*Proof.* The problem of finding  $M$  can be written in the form of a convex optimization problem as:

$$\begin{aligned} & \text{minimize : } \|M - M'\|_F^2 \\ & \text{subject to : } 0 \preceq M \preceq I, \text{tr } M = k. \end{aligned}$$

Because the objective is strongly convex, and the constraints are convex, this problem must have a unique solution. Letting  $\sigma_1, \dots, \sigma_d$  and  $v_1, \dots, v_d$  be the eigenvalues and associated eigenvectors of  $M$ , we may write the KKT first-order optimality conditions (Boyd & Vandenberghe, 2004) as:

$$0 = M - M' + \mu I - \sum_{i=1}^d \alpha_i v_i v_i^T + \sum_{i=1}^d \beta_i v_i v_i^T, \quad (\text{A.1})$$

where  $\mu$  is the Lagrange multiplier for the constraint  $\text{tr } M = k$ , and  $\alpha_i, \beta_i \geq 0$  are the Lagrange multipliers for the constraints  $0 \preceq M$  and  $M \preceq I$ , respectively. The complementary slackness conditions are that  $\alpha_i \sigma_i = \beta_i (\sigma_i - 1) = 0$ . In addition,  $M$  must be feasible.

Because every term in Equation A.1 *except* for  $M'$  has the same set of eigenvectors as  $M$ , it follows that an optimal  $M$  must have the same set of eigenvectors as  $M'$ , so we may take  $v_i = v'_i$ , and write Equation A.1 purely in terms of the eigenvalues:

$$\sigma_i = \sigma'_i - \mu + \alpha_i - \beta_i.$$

Complementary slackness and feasibility with respect to the constraints  $0 \preceq M \preceq I$  gives that if  $0 \leq \sigma'_i - \mu \leq 1$ , then  $\sigma_i = \sigma'_i - \mu$ . Otherwise,  $\alpha_i$  and  $\beta_i$  will be chosen so as to clip  $\sigma_i$  to the active constraint:

$$\sigma_i = \max(0, \min(1, \sigma'_i - \mu)).$$

Primal feasibility with respect to the constraint  $\text{tr } M = k$  gives that  $\mu$  must be chosen in such a way that  $\text{tr } M = k$ , completing the proof.  $\square$
